# Supplementary material for: On Recent Large Antarctic Ozone Holes and Ozone Recovery Metrics
Source: PubMed Central journal article supplement — Geophys Res Lett. 2021 Nov 18;48(22):e2021GL095232. doi: 10.1029/2021GL095232 (PMC9286815; doi:10.1029/2021gl095232), 2021-11-18
Supplement: GRL-48-0-s001.pdf [file GRL-48-0-s001.pdf]

1

2

*Geophysical Research Letters*

3

Supporting Information for

4

**On Recent Large Antarctic Ozone Holes and Ozone Recovery Metrics**

5

K. A. Stone<sup>1</sup>, S. Solomon<sup>1</sup>, D. E. Kinnison<sup>2</sup>, and Michael J. Mills<sup>2</sup>

6

<sup>1</sup>Department of Earth, Atmospheric, and Planetary Science, Massachusetts Institute of Technology, Cambridge, MA, USA

7

8

<sup>2</sup>Atmospheric Chemistry Observations and Modeling Laboratory, National Center for Atmospheric Research, Boulder, CO, USA

9

10

**Introduction**

11

Supplementary Figures S1-S5 are shown below.

12

13

14

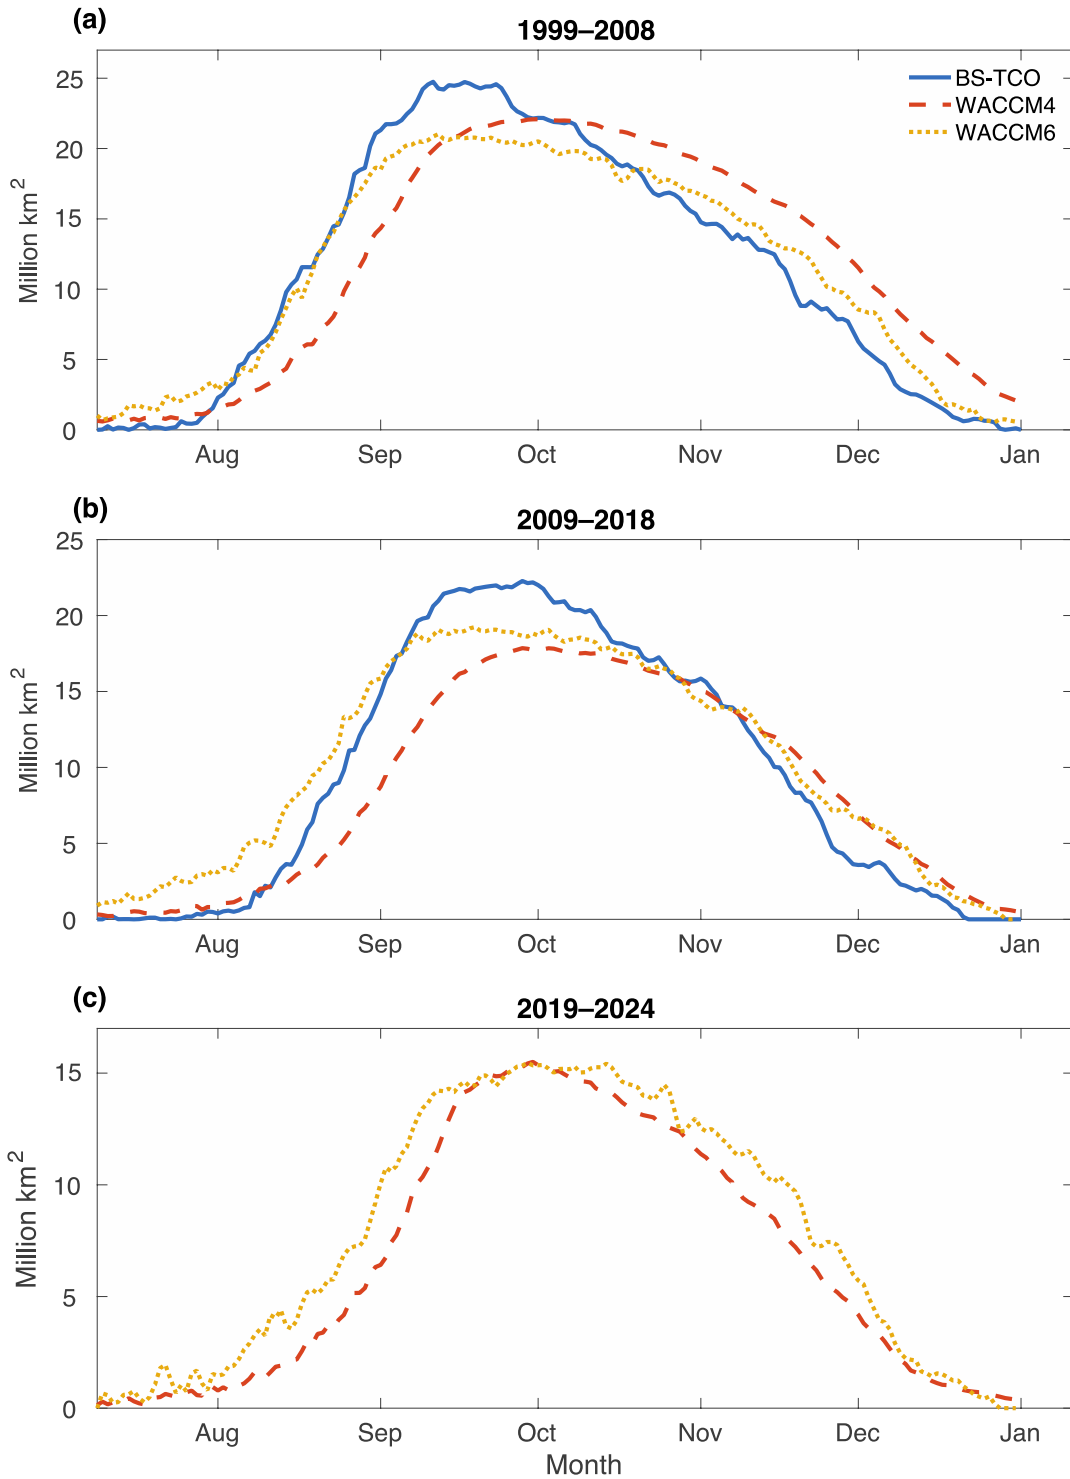

15  
 16 **Figure S1. Direct Comparison of BS-TCO, WACCM4 and WACCM6 ozone hole**  
 17 **size for three different time periods. Ozone hole sizes are calculated from Southern**  
 18 **Hemisphere polar areas below 220 DU.**  
 19

20

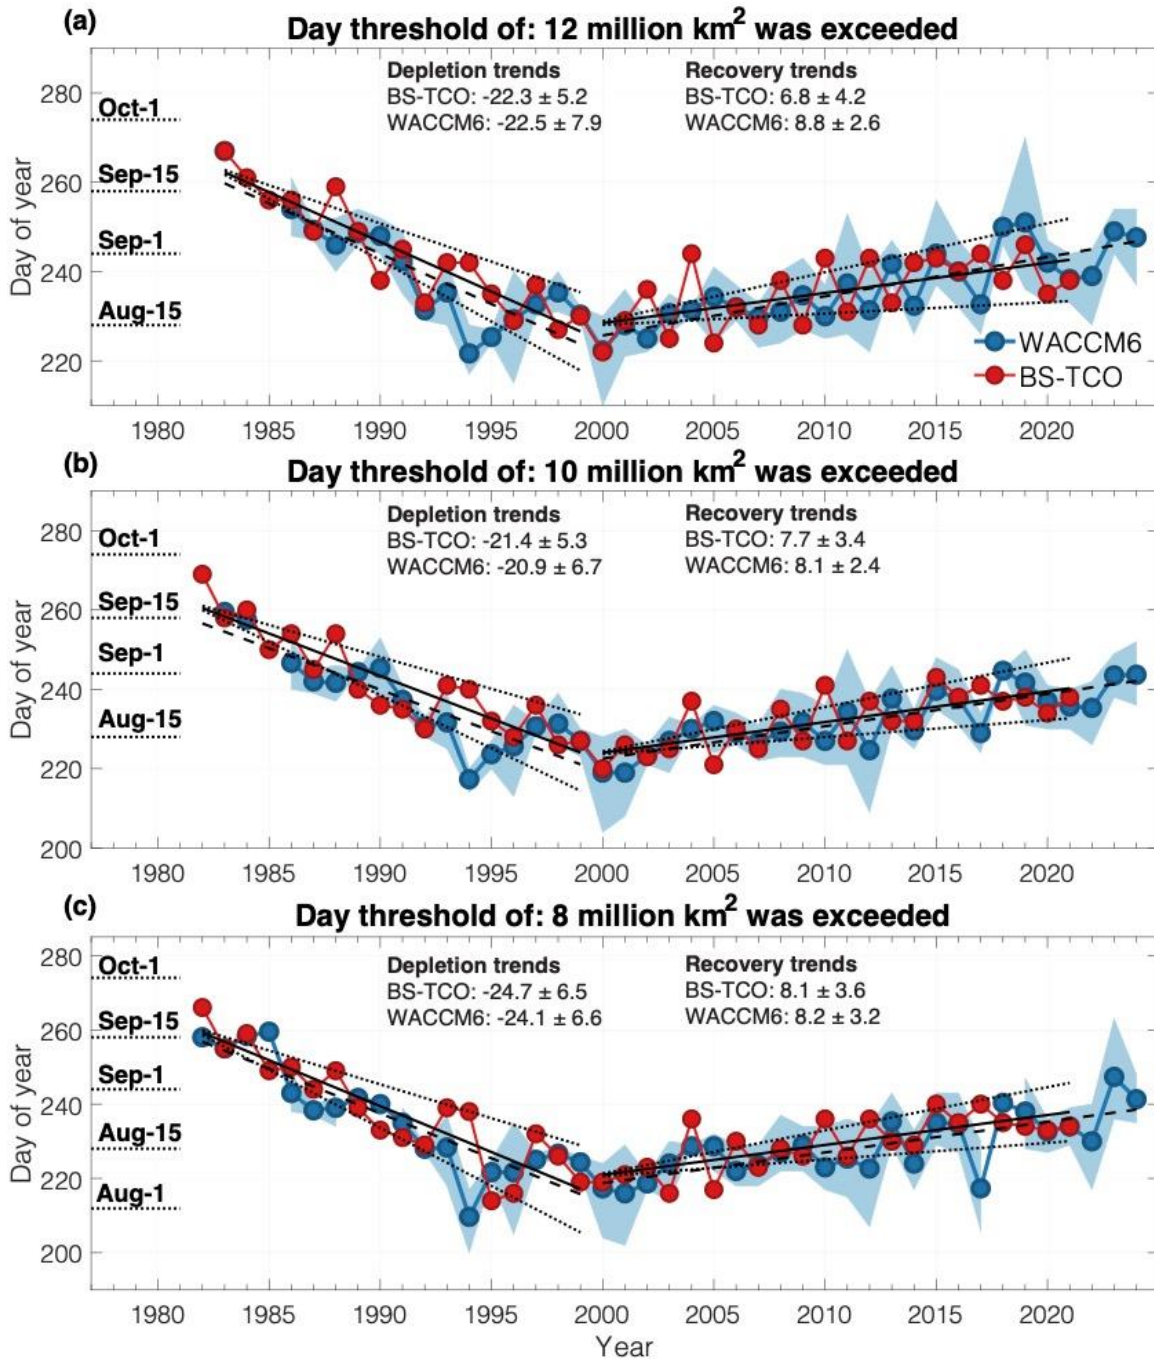

21  
22  
23

Figure S2. Same as Figure 2a, except for different area thresholds of 10 and 8 million km<sup>2</sup>

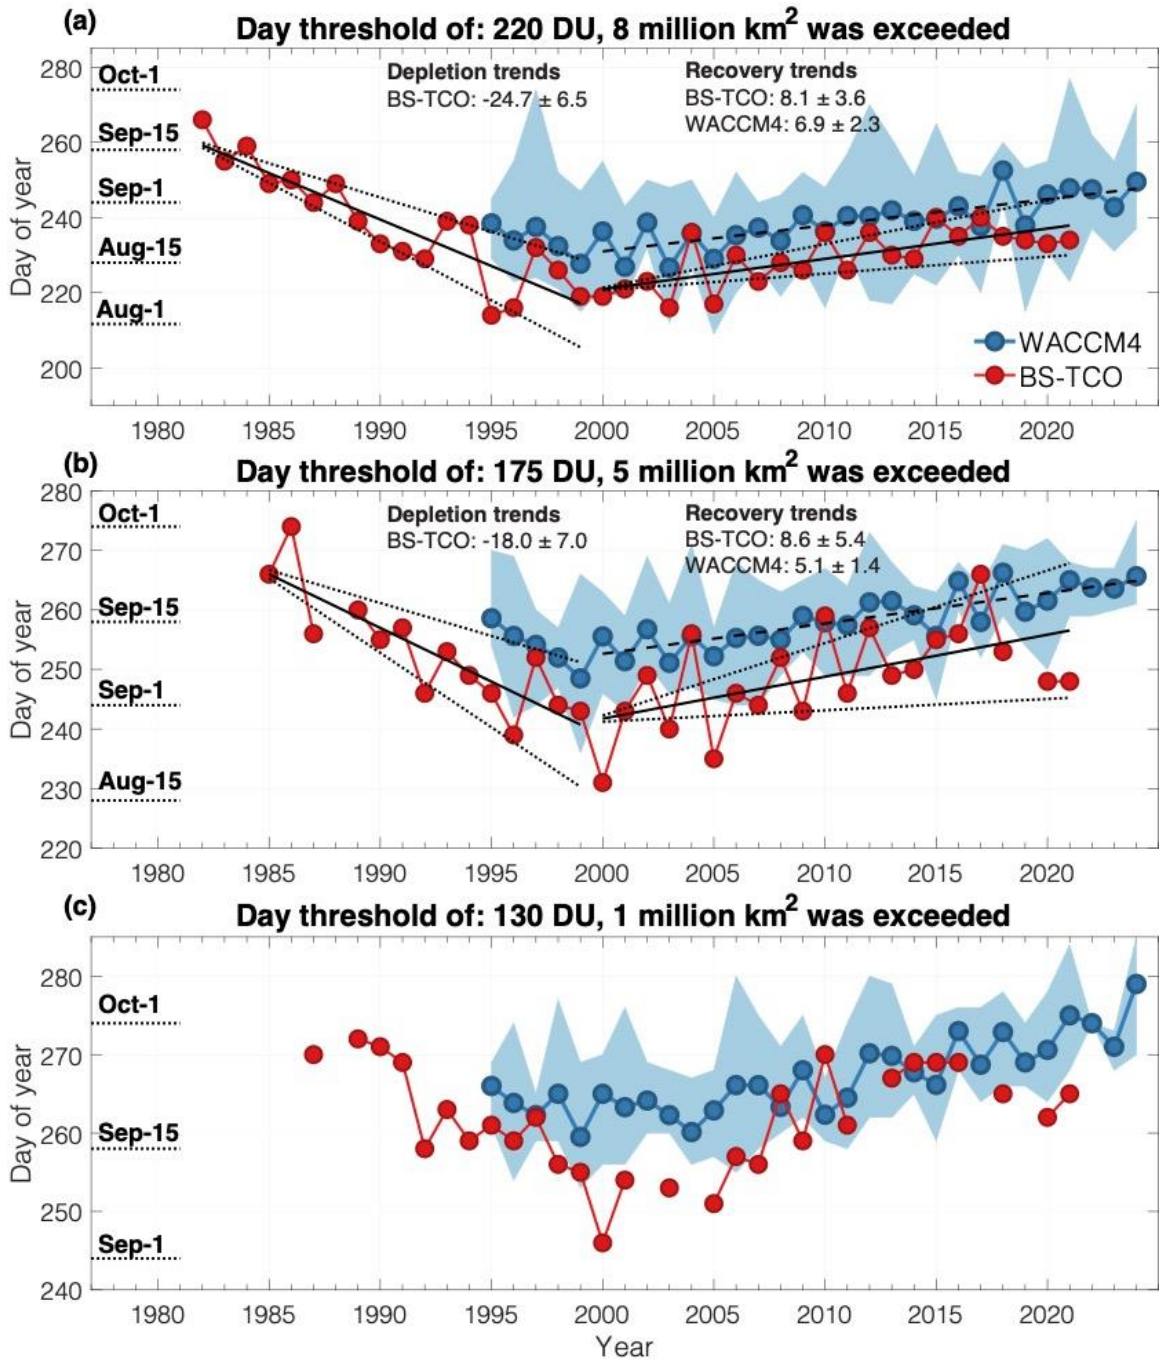

24  
25  
26  
27

Figure S3. Same as Figure 2, but for BS-TCO comparison to WACCM4

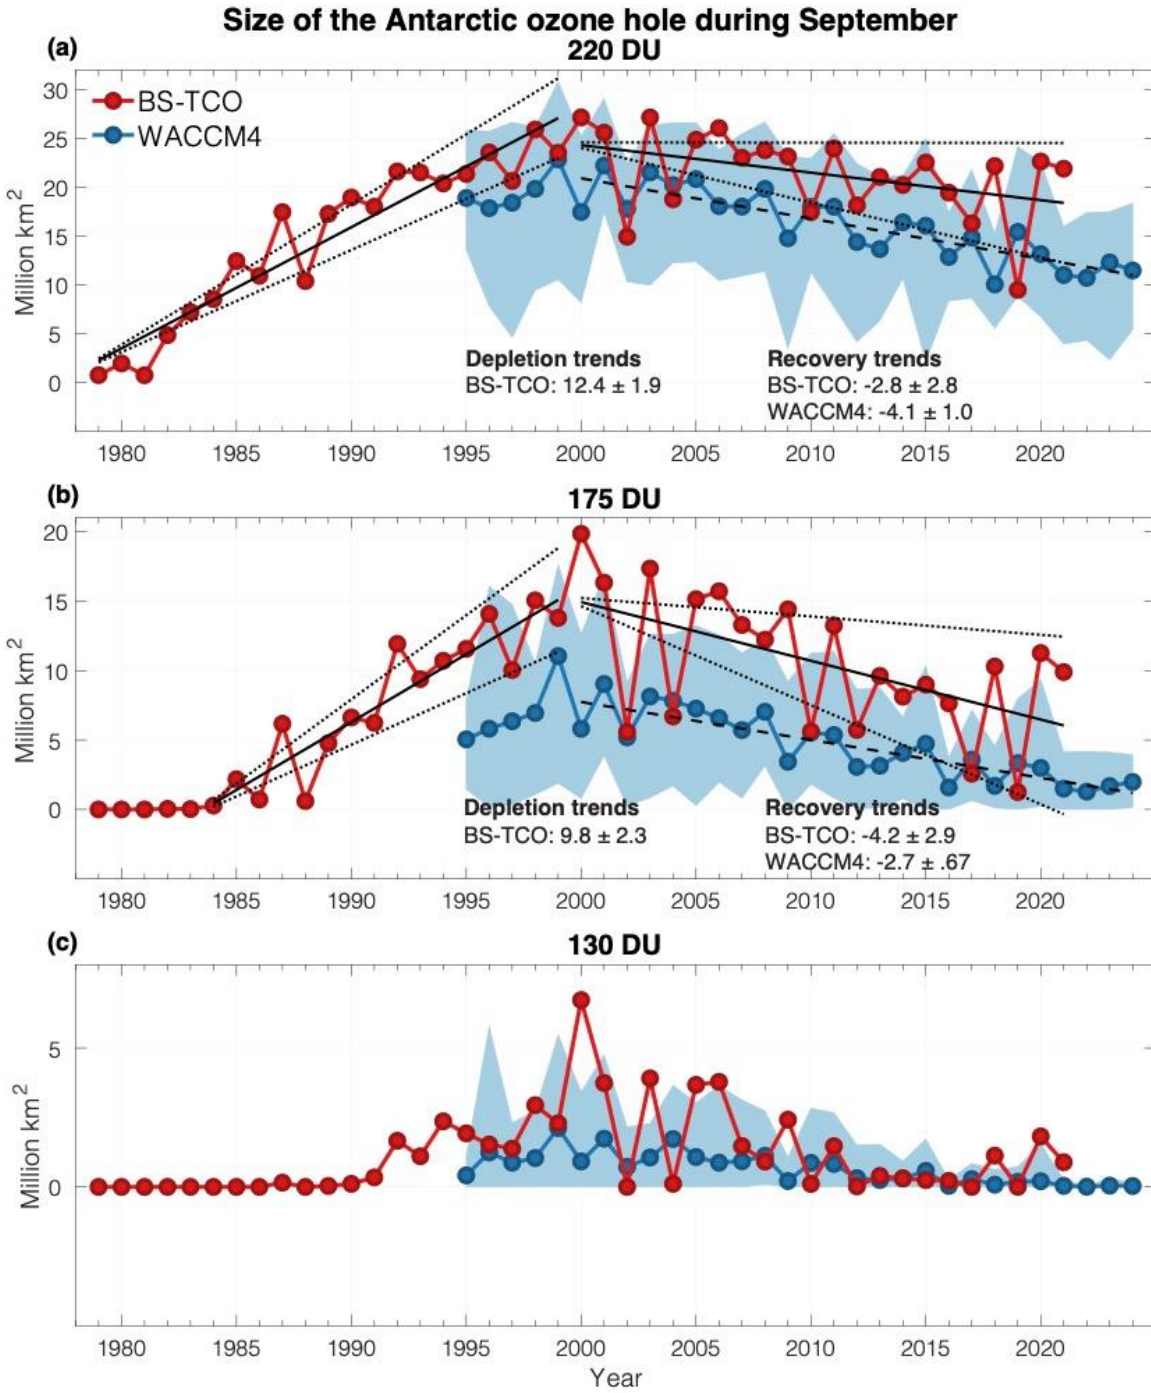

28  
29

**Figure S4. Same as Figure 3, but for BS-TCO comparison to WACCM4**

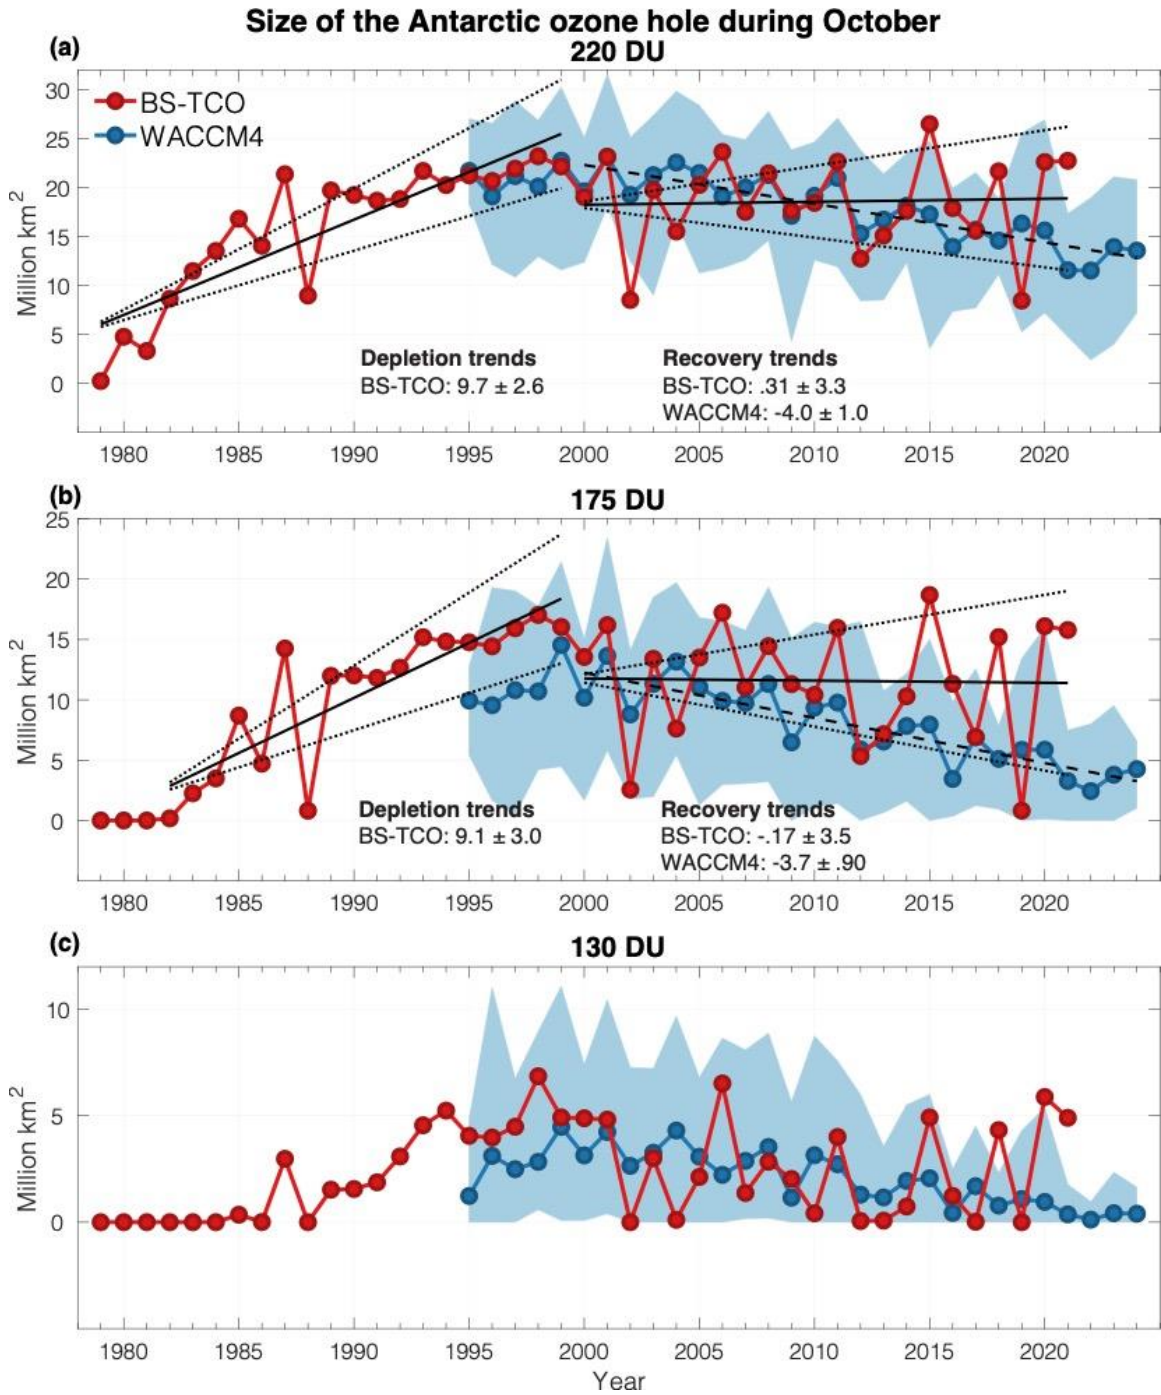

**Figure S5. Same as Figure 4, but for BS-TCO comparison to WACCM4**

30  
31  
32
